# Supplementary material
Source: PubMed Central journal article supplement (PMC5881615)
Supplement: supp_gnv666_Supplemental_Tables.pdf [file supp_gnv666_Supplemental_Tables.pdf]

**Supplemental Table 1. Association between Veteran status and hysterectomy excluding women with oophorectomy and an intact uterus (n = 3,963), stratified by birth cohort**

| Birth Cohort                | Non-Veterans |      | Veterans |      | OR <sup>a</sup> (95% CI) | p-value |
|-----------------------------|--------------|------|----------|------|--------------------------|---------|
|                             | N            | %    | N        | %    |                          |         |
| <b>&lt;65 at enrollment</b> |              |      |          |      |                          |         |
| None <sup>b</sup>           | 44,828       | 63.0 | 700      | 58.0 | 1.00                     | -       |
| Hysterectomy without BSO    | 11,834       | 16.6 | 215      | 17.8 | 1.27 (1.08, 1.48)        | 0.003   |
| Hysterectomy with BSO       | 14,544       | 20.4 | 292      | 24.2 | 1.27 (1.11, 1.46)        | <0.001  |
| <b>≥65 at enrollment</b>    |              |      |          |      |                          |         |
| None <sup>b</sup>           | 32,792       | 60.3 | 1,248    | 60.3 | 1.00                     | -       |
| Hysterectomy without BSO    | 9,009        | 16.6 | 352      | 17.0 | 1.08 (0.96, 1.22)        | 0.22    |
| Hysterectomy with BSO       | 12,582       | 23.1 | 470      | 22.7 | 0.98 (0.88, 1.09)        | 0.72    |

BSO-bilateral salpingo oophorectomy, CI-confidence interval, OR-odds ratio

<sup>a</sup>Adjusted for age (continuous), race (white, non-white), and parity (nominal)

<sup>b</sup>Excluding individuals without hysterectomy but with any removal of ovaries (partial, unilateral, or bilateral) or unknown removal status

**Supplemental Table 2. Association between Veteran status and hysterectomy excluding women with a history of reproductive cancer (n = 3,899), stratified by birth cohort**

| Birth Cohort                | Non-Veterans |      | Veterans |      | OR <sup>a</sup> (95% CI) | p-value |
|-----------------------------|--------------|------|----------|------|--------------------------|---------|
|                             | N            | %    | N        | %    |                          |         |
| <b>&lt;65 at enrollment</b> |              |      |          |      |                          |         |
| None                        | 46,666       | 61.6 | 734      | 57.9 | 1.00                     | -       |
| Hysterectomy without BSO    | 15,394       | 20.3 | 261      | 20.6 | 1.16 (1.00, 1.34)        | 0.04    |
| Hysterectomy with BSO       | 13,653       | 18.0 | 273      | 21.5 | 1.26 (1.10, 1.45)        | 0.001   |
| <b>≥65 at enrollment</b>    |              |      |          |      |                          |         |
| None <sup>b</sup>           | 34,461       | 59.5 | 1,314    | 59.8 | 1.00                     | -       |
| Hysterectomy without BSO    | 12,011       | 20.7 | 465      | 21.2 | 1.06 (0.95, 1.18)        | 0.33    |
| Hysterectomy with BSO       | 11,426       | 19.7 | 418      | 19.0 | 0.98 (0.88, 1.10)        | 0.74    |

BSO-bilateral salpingo oophorectomy, CI-confidence interval, OR-odds ratio

<sup>a</sup>Adjusted for age (continuous), race (white, non-white), and parity (nominal)

<sup>b</sup>Including women without hysterectomy but with partial, unilateral, or bilateral oophorectomy or unknown number of ovaries removed

**Supplemental Table 3. Association between Veteran status and early hysterectomy excluding women with a history of reproductive cancer (n = 4,039), stratified by birth cohort**

| <b>Birth cohort</b>         | <i>Non-Veterans</i> |          | <i>Veterans</i> |          | <b>RR<sup>a</sup> (95% CI)</b> | <b>p-value</b> |
|-----------------------------|---------------------|----------|-----------------|----------|--------------------------------|----------------|
|                             | <b>N</b>            | <b>%</b> | <b>N</b>        | <b>%</b> |                                |                |
| <b>&lt;65 at enrollment</b> | 11,943              | 15.6     | 255             | 19.9     | 1.31 (1.17, 1.46)              | <0.001         |
| <b>≥65 at enrollment</b>    | 6,332               | 10.6     | 197             | 8.7      | 0.90 (0.78, 1.03)              | 0.11           |

BSO-bilateral salpingo oophorectomy, CI-confidence interval, RR-relative risk

<sup>a</sup>Adjusted for age (continuous), race (white, non-white), and parity (nominal)
